# Supplementary material for: Sub-zero self-healable and fatigue-resistant conductive ionoelastomers for sensorized soft pneumatic robots
Source: Royal Society of Chemistry journal article supplement (doi:10.1039/d4ta04081c), 2024-01-01
Supplement: d4ta04081c6.pdf [file d4ta04081c6.pdf]

## Supplementary Information (SI)

Sub-zero self-healable and fatigue resistant conductive ionoelastomers for sensorized soft pneumatic robots

Yang Wang\*, Zhanwei Wang, Fatma Demir, Yinxin Cai, Zijin Liu, Jing Ren, Guy Van Assche, Shengjie Ling\*, Bram Vanderborght\*, Seppe Terryn

### Supplementary Note 1. The derivation of SPA content within PSSFIE.

According to the Scheme 1 in the main text, the reaction can be simplified into

$RCOO^- + H^+ \rightleftharpoons RCOOH$ . And because the pKa of PAA is 4.2, acid dissociation constant of PAA can be derived:

$$K_a (RCOOH) = \frac{[RCOO^-][H^+]}{[RCOOH]} = 10^{-pKa} \quad (1)$$

$$-pKa = \lg^{[H^+]} + \lg \frac{[RCOO^-]}{[RCOOH]} \quad (2)$$

$$\lg \frac{[RCOO^-]}{[RCOOH]} = pH - pKa \quad (3)$$

$$\frac{n(SPA)}{n(PAA)} = 10^{pH - pKa} \quad (4)$$

Owing to the pH result of PSSFIE which was close to 7, so  $\frac{n(SPA)}{n(PAA)}$  was greater than 100, showcasing that SPA mainly exists in PSSFIE.

i . Evaporation      ii. SF Crystallization and PAA/SPA inflation      iii. Two-phase structure

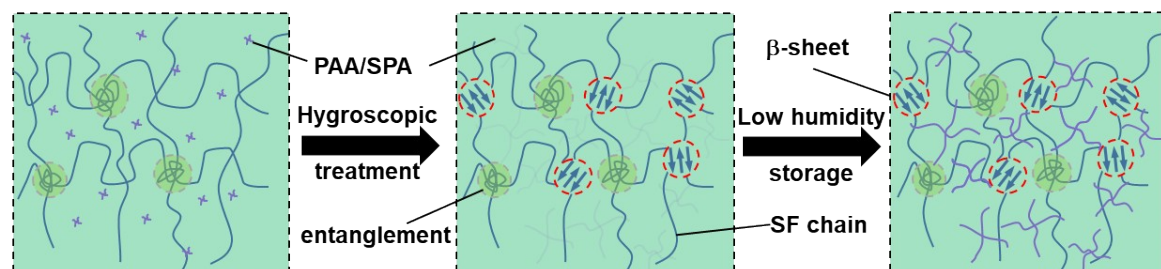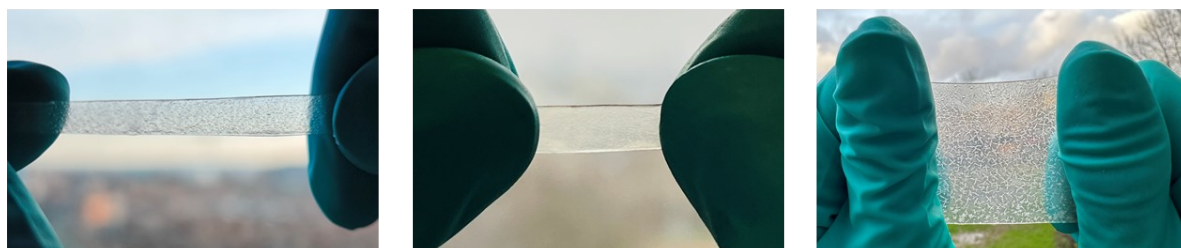

**Fig. S1** Schematic illustration of preparation process of PSSFIE and corresponding photographs showing each stage of the process.

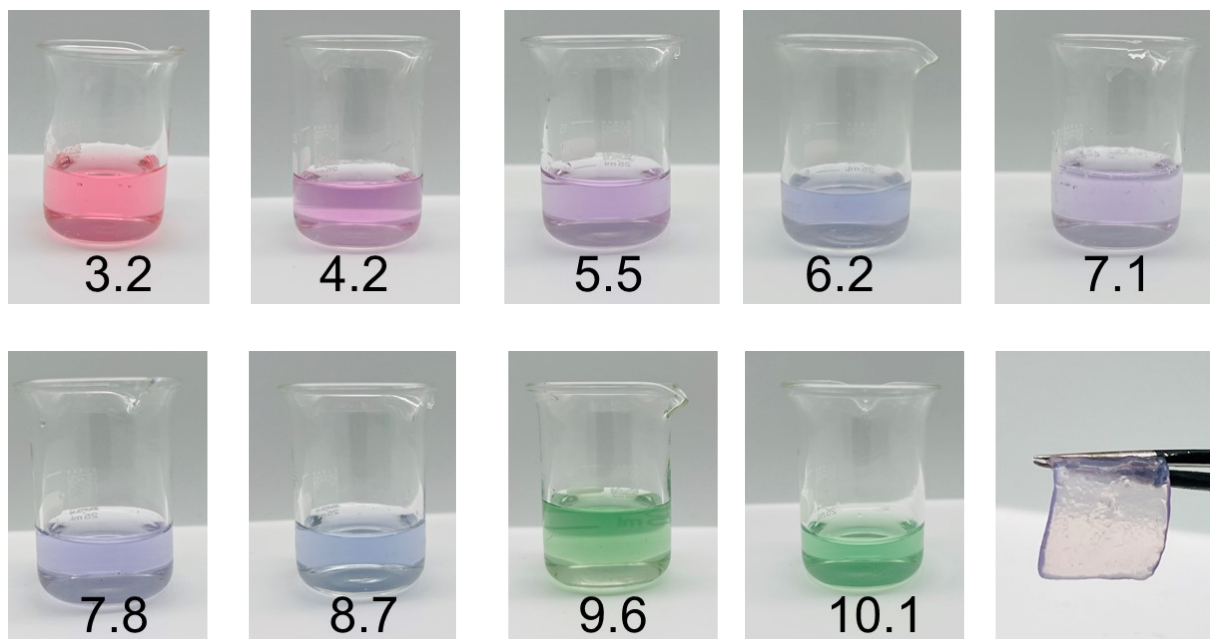

**Fig. S2** The photographs of varied colored solutions across a range of pH conditions using a boiled red cabbage aqueous solution as a pH indicator and photograph of PSSFIE after immersed in the boiled red cabbage aqueous solution.

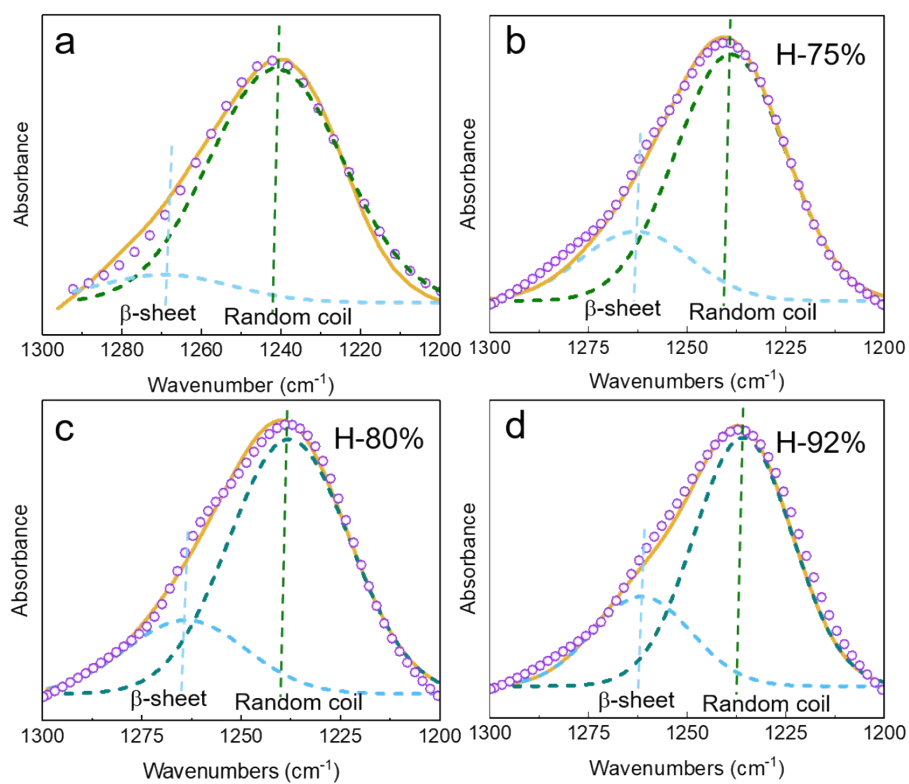

**Fig. S3** Deconvolution results of the amide III band of the PSSFIE before (a) and with various hygroscopic treatments (b-d).

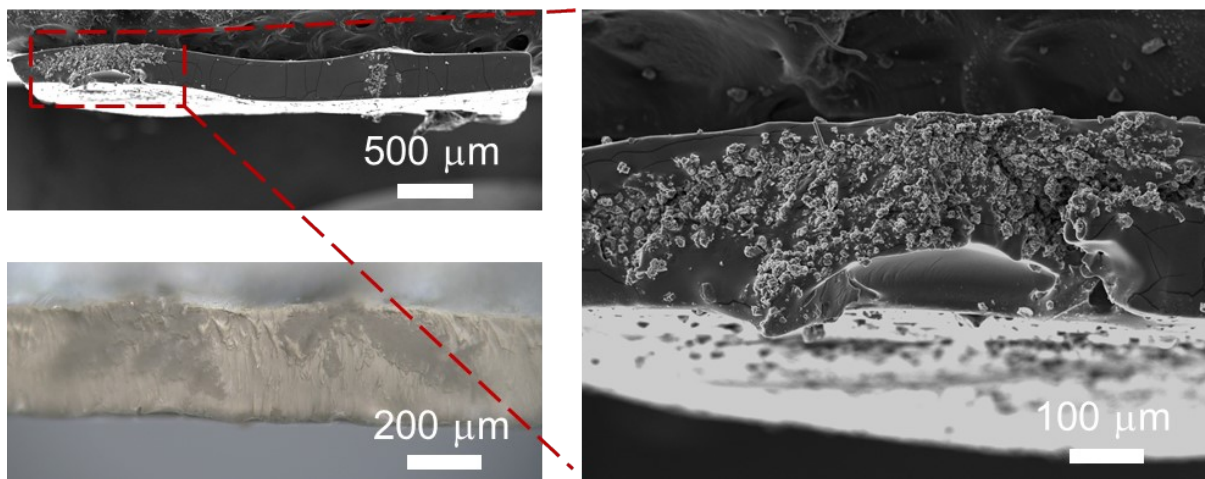

**Fig. S4** Cross-sectional SEM and microscopic images of PSSFIE.

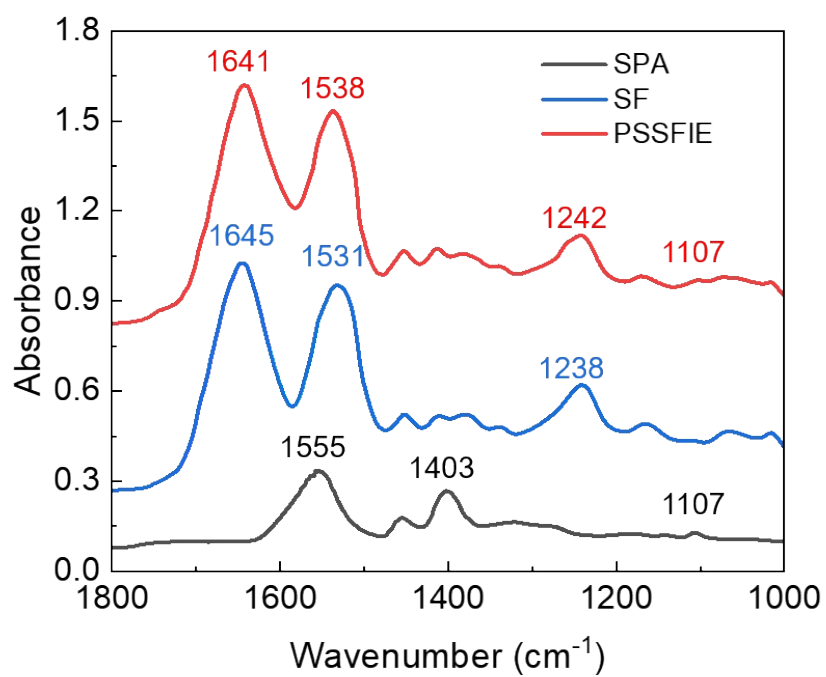

**Fig. S5** ATR-FTIR spectra of sodium polyacrylate (SPA), pure silk fibroin (SF) film and PSSFIE.

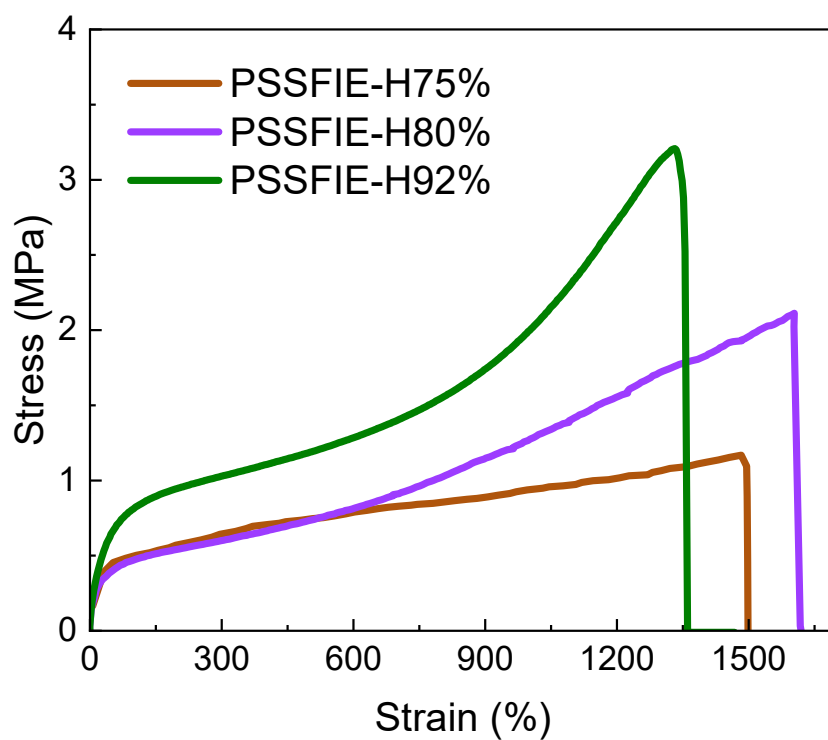

**Fig. S6** Stress-strain curves of PSSFIE under various hygroscopic treatments.



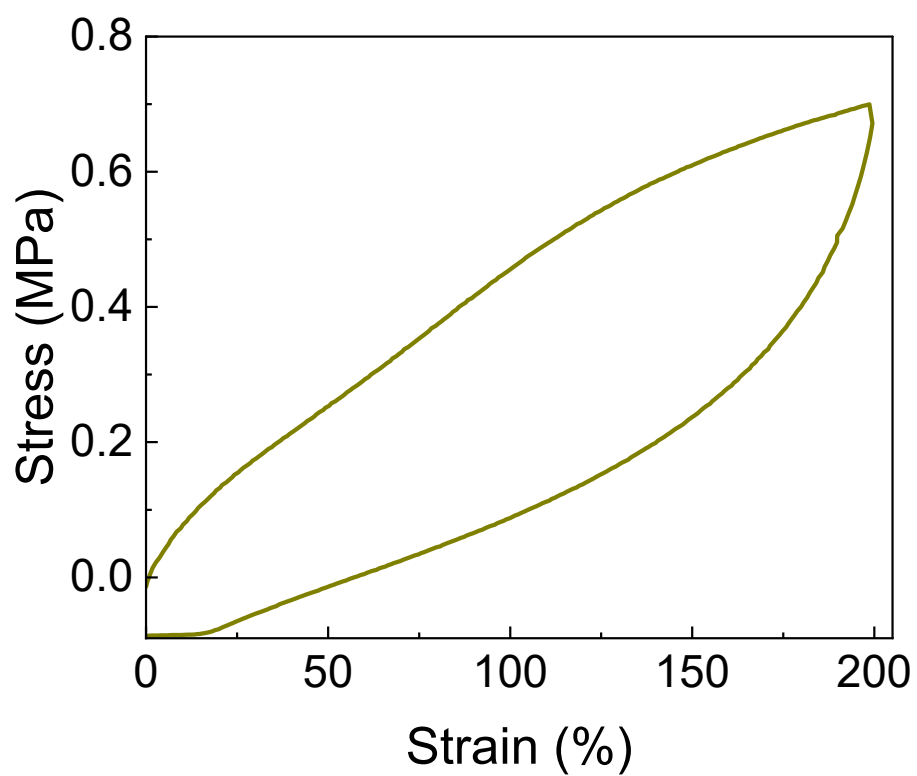

**Fig. S7** The first cyclic stress–strain curve of the PSSFIE with a stretch amplitude of 200%.

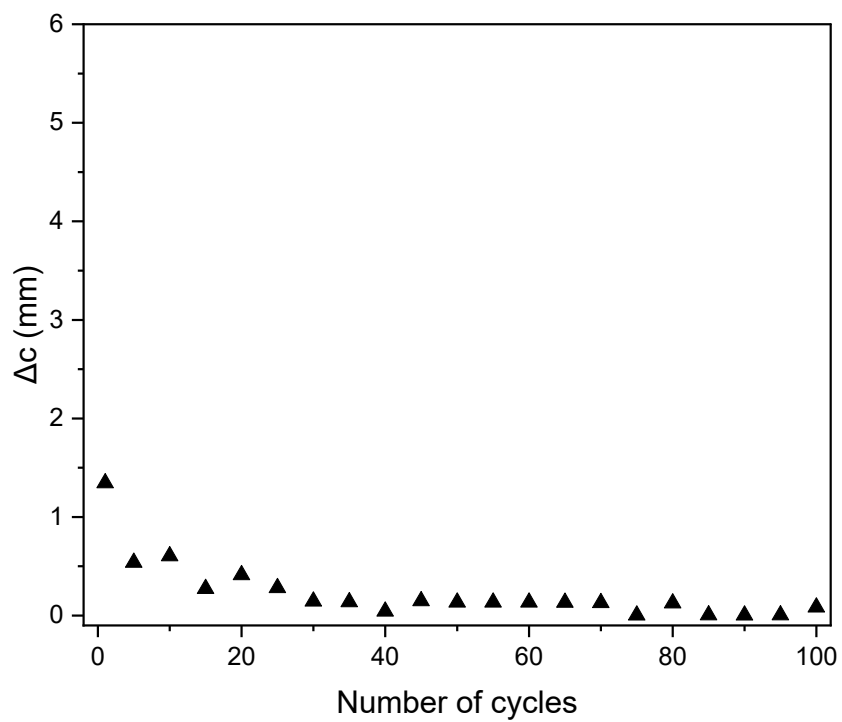

**Fig. S8** The extension of the crack ( $\Delta c$ ) of PSSFIE within 100 cycles.

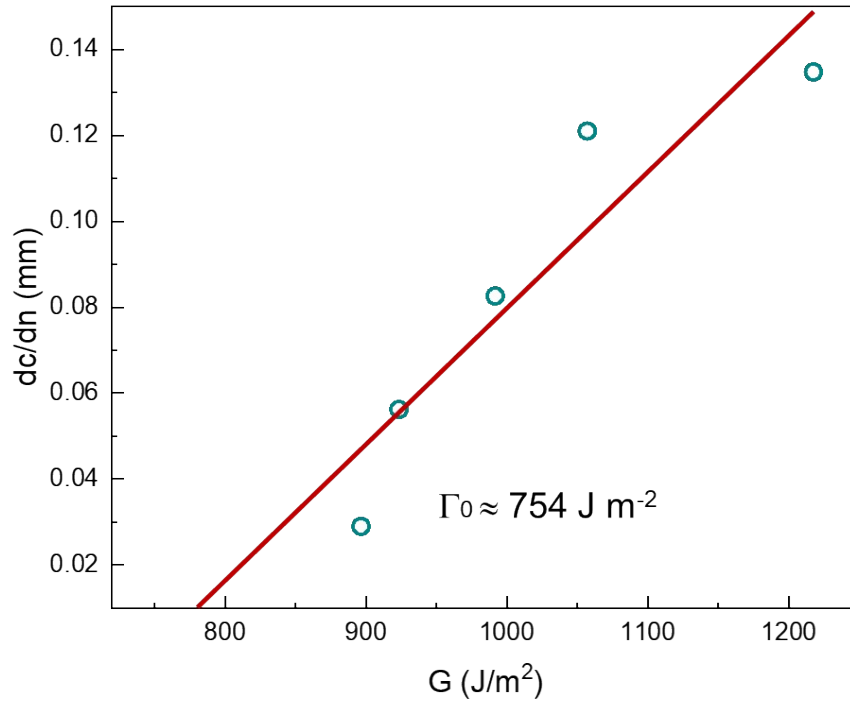

**Fig. S9** Fatigue threshold  $\Gamma_0$  of PSSFIE.

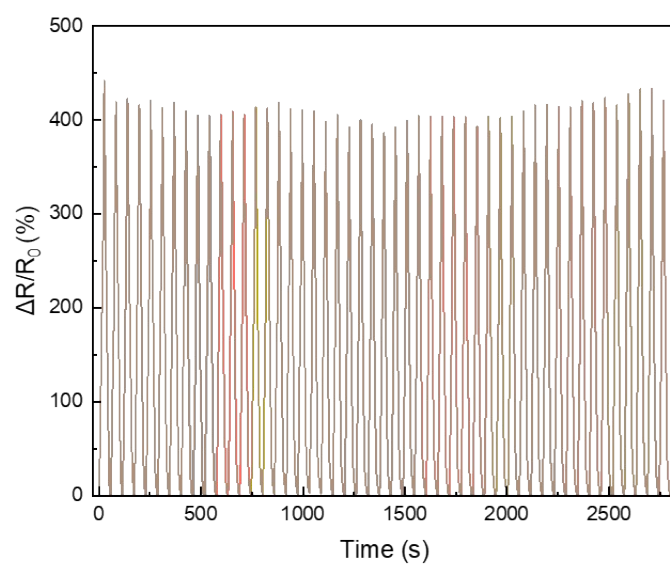

**Fig. S10** The relative change in resistance curve of PSSFIE with a stretch amplitude of 200% over 50 cycles.

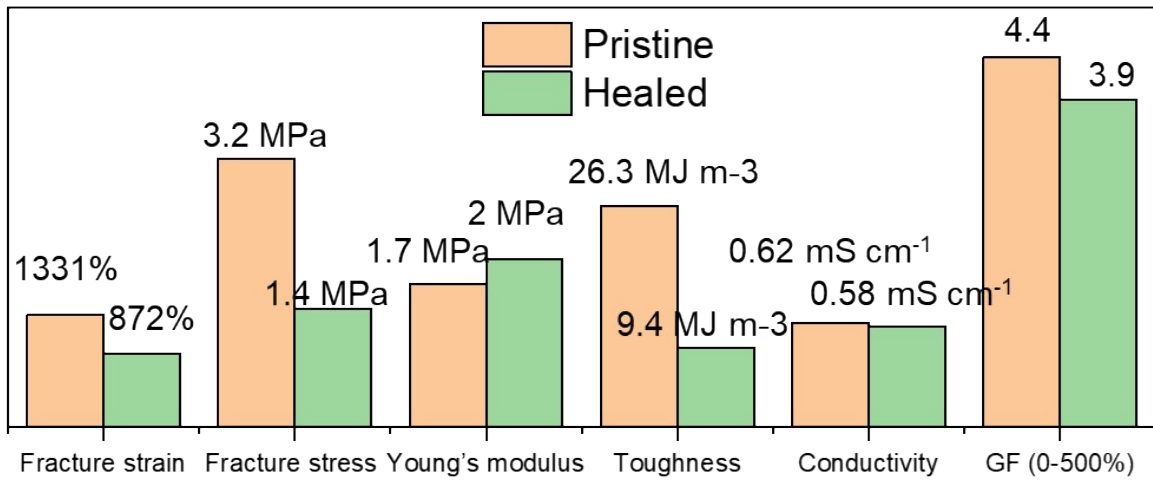

**Fig. S11** Block chart showing healing efficiencies of PSSFIE based on fracture strain, fracture stress, Young's modulus, toughness, Conductivity, and GF.

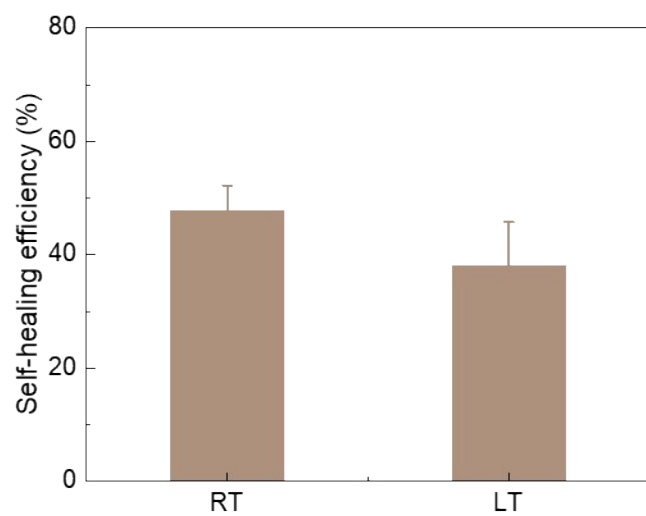

**Fig. S12** The self-healing efficiency of PSSFIE self-healed at room temperature (RT) and low temperature (LT, -20°C).

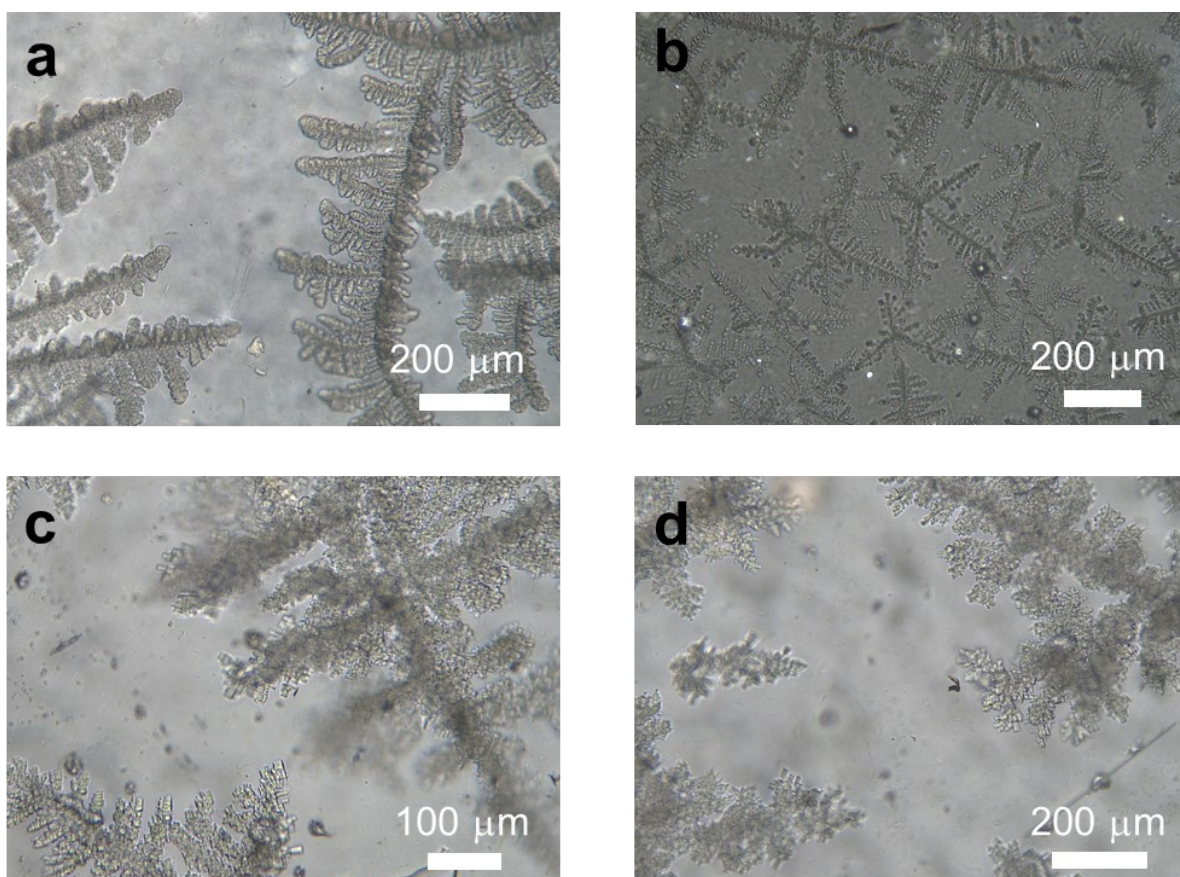

**Fig. S13** The microscopic images of exposed (a, b) and sealed (c, d) PSSFIE specimens showing morphology changes before and after staying at the environment of -20 °C for 3 days.

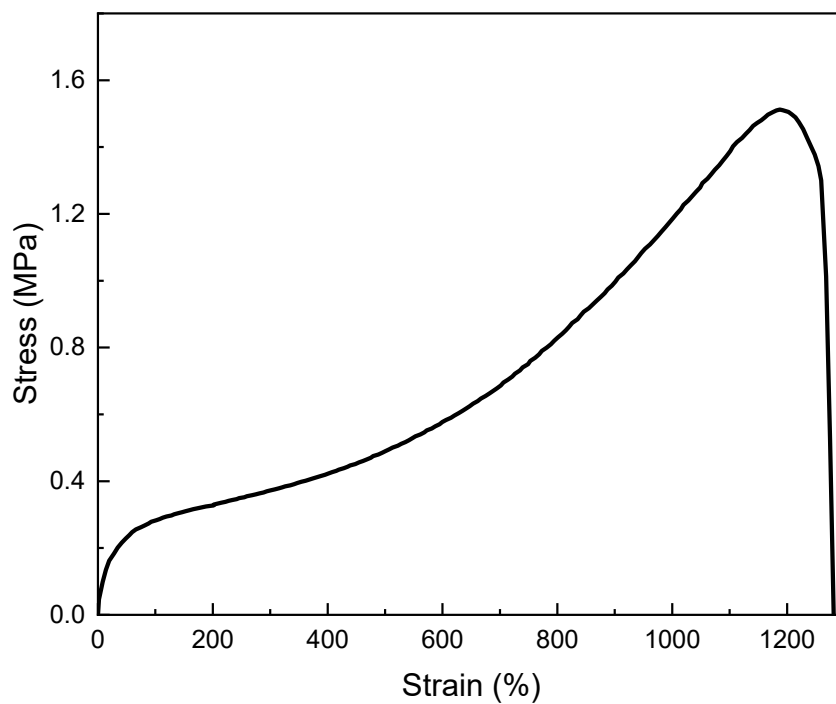

**Fig. S14** The stress-strain curve of PSSFIE after self-healing in -20°C for 3 days.



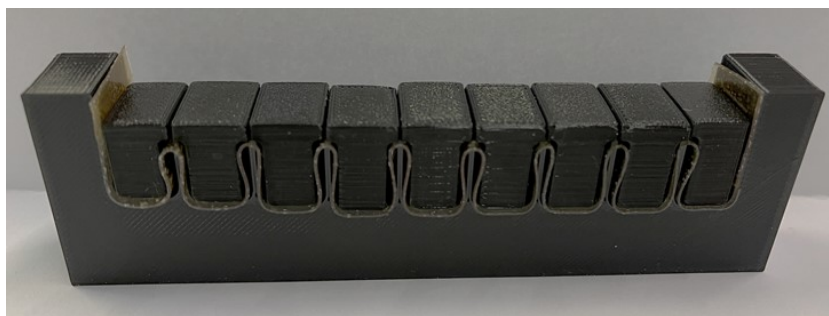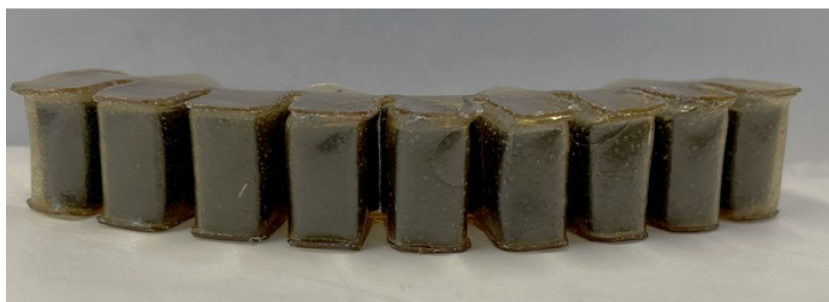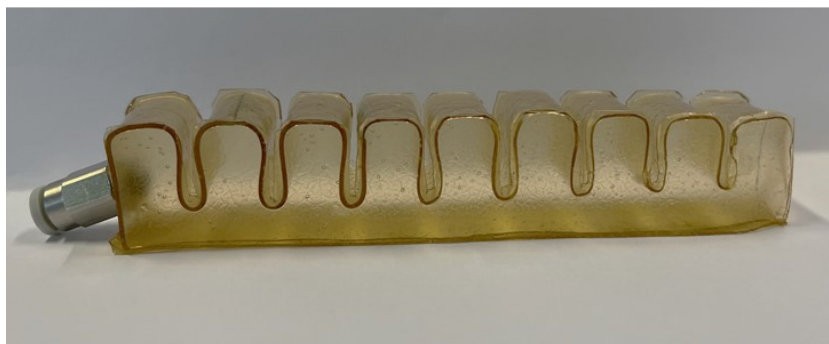

**Fig. S15** The manufacturing of the PSSFIE-based soft fingers.

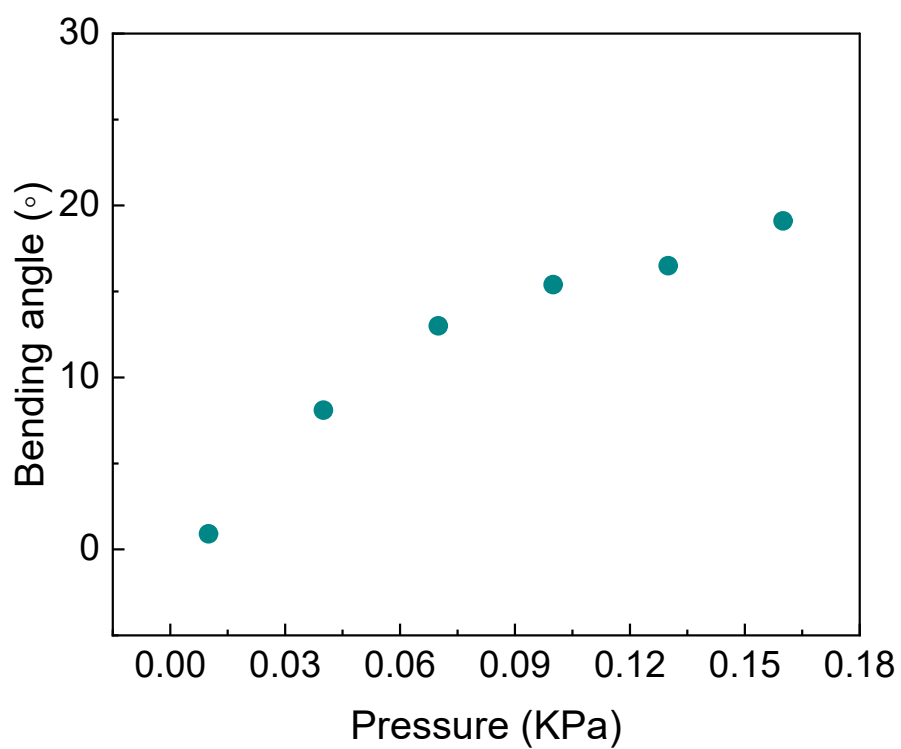

**Fig. S16** The bending angle of damaged-healed PSSFIE-base soft fingers with the change of pressure at freezing temperature (0°C).
